# Supplementary material
Source: PubMed Central journal article supplement (PMC4334131)
Supplement: NIHMS623206-supplement-supplemental_material.pdf [file NIHMS623206-supplement-supplemental_material.pdf]

## SUPPLEMENTAL MATERIAL

Supplemental Methods. Literature search strategy in Pubmed.

#1 Search "Fatty Acids, Omega-6"[Mesh] OR "n-6 fatty acid\*"[tiab] OR "omega-6 fatty acid\*"[tiab] OR "essential fatty acid\*"[tiab] OR "polyunsaturated fatty acid\*"[tiab] OR "fatty acid" [tiab] OR "linoleic acid"[tiab] OR "corn oil"[tiab] OR "sunflower oil" [tiab]

#2 Search "Cerebrovascular Disorders"[Mesh] OR "stroke\*"[tiab] OR "cerebrovascular accident\*"[tiab]

#3 Search "Cardiovascular diseases"[Mesh] OR "cardiovascular"[tiab] OR "heart"[tiab] OR "myocardial infarction\*"[tiab] OR "sudden death\*"[tiab] OR "coronary heart disease" OR "CHD"

#4 Search "Mortality"[Mesh] OR "Death"[Mesh] OR "mortality"[tiab] OR "death"[tiab] OR "fatal"[tiab]

#5 Search "Epidemiology "[MESH] OR "Epidemiologic Studies"[MESH] OR "Intervention Studies" [MESH] OR "cohort\*"[tiab] OR "incident\*"[tiab] OR "incidence\*"[tiab] OR "prospective"[tiab] OR "follow-up" [tiab] OR "predict\*"[tiab] OR "prognos\*"[tiab] OR "case-control"[tiab] OR "cross-sectional"[tiab] OR "intervention\*"[tiab] OR "clinical trial\*"[tiab] OR "randomized\*"[tiab]

#6 Search #2 OR #3 OR #4

#7 Search #1 AND #5

#8 Search #6 AND #7

Table S1. Extracted and calculated data for the included studies for dietary linoleic acid and coronary heart disease events.

| Study name                                                    | Category | RR   | LL   | UL   | Median of E% from LA intake | Number of cases | person/year       |
|---------------------------------------------------------------|----------|------|------|------|-----------------------------|-----------------|-------------------|
| <b>MONICA –in women, total CHD events (24)</b>                |          |      |      |      |                             |                 |                   |
|                                                               | 1        | 1    | 1    | 1    | 2.57 <sup>1</sup>           | 54              | 513 <sup>2</sup>  |
|                                                               | 2        | 0.67 | 0.43 | 1.03 | 4.13                        | 51              | 606               |
|                                                               | 3        | 0.65 | 0.33 | 1.21 | 6.58                        | 54              | 524               |
| <b>MONICA –in men, total CHD events (24)</b>                  |          |      |      |      |                             |                 |                   |
|                                                               | 1        | 1    | 1    | 1    | 2.56 <sup>1</sup>           | 105             | 553 <sup>2</sup>  |
|                                                               | 2        | 1.00 | 0.74 | 1.34 | 3.98                        | 102             | 565               |
|                                                               | 3        | 1.03 | 0.73 | 1.46 | 6.10                        | 105             | 516               |
| <b>MORGEN-in men and women, total CHD events (25)</b>         |          |      |      |      |                             |                 |                   |
|                                                               | 1        | 1    | 1    | 1    | 3.7                         | 61              | 4013 <sup>2</sup> |
|                                                               | 2        | 0.90 | 0.61 | 1.33 | 4.7                         | 50              | 4014              |
|                                                               | 3        | 0.83 | 0.56 | 1.24 | 5.4                         | 46              | 4014              |
|                                                               | 4        | 1.00 | 0.68 | 1.47 | 6.2                         | 61              | 4014              |
|                                                               | 5        | 0.90 | 0.60 | 1.36 | 7.7                         | 62              | 4014              |
| <b>NHS, in women, total CHD events (26)<sup>3</sup></b>       |          |      |      |      |                             |                 |                   |
|                                                               | 1        | 1    | 1    | 1    | 2.94                        | 1099            | 465,643           |
|                                                               | 2        | 0.86 | 0.77 | 0.94 | 3.95                        | 729             | 467,525           |
|                                                               | 3        | 0.87 | 0.78 | 0.97 | 4.60                        | 680             | 467,975           |
|                                                               | 4        | 0.80 | 0.71 | 0.90 | 5.26                        | 621             | 467,906           |
|                                                               | 5        | 0.75 | 0.65 | 0.85 | 6.38                        | 647             | 467,547           |
| <b>HPFS, in men, total CHD events (27)<sup>3</sup></b>        |          |      |      |      |                             |                 |                   |
|                                                               | 1        | 1    | 1    | 1    | 3.58                        | 842             | 182,079           |
|                                                               | 2        | 1.00 | 0.90 | 1.11 | 4.37                        | 776             | 182,779           |
|                                                               | 3        | 1.02 | 0.91 | 1.15 | 4.95                        | 758             | 182,970           |
|                                                               | 4        | 1.02 | 0.90 | 1.15 | 5.60                        | 731             | 182,931           |
|                                                               | 5        | 0.98 | 0.86 | 1.13 | 6.73                        | 735             | 182,930           |
| <b>ATBC study, in men, total CHD events (28)<sup>3</sup></b>  |          |      |      |      |                             |                 |                   |
|                                                               | 1        | 1    | 1    | 1    | 1.50                        | 307             | 23,825            |
|                                                               | 2        | 0.86 | 0.70 | 1.05 | 1.88                        | 251             | 24,409            |
|                                                               | 3        | 0.92 | 0.72 | 1.19 | 2.34                        | 261             | 24,269            |
|                                                               | 4        | 0.83 | 0.62 | 1.11 | 3.26                        | 235             | 24,702            |
|                                                               | 5        | 0.86 | 0.58 | 1.27 | 6.01                        | 285             | 24,608            |
| <b>ARIC Study, in women, total CHD events (4)<sup>4</sup></b> |          |      |      |      |                             |                 |                   |
|                                                               | 1        | 1    | 1    | 1    | 2.96                        | 47              | 19,078            |
|                                                               | 2        | 0.59 | 0.33 | 1.06 | 4.08                        | 35              | 19,925            |
|                                                               | 3        | 0.64 | 0.33 | 1.25 | 5.54                        | 41              | 19,196            |
| <b>ARIC Study, in men, total CHD events (4)<sup>4</sup></b>   |          |      |      |      |                             |                 |                   |
|                                                               | 1        | 1    | 1    | 1    | 2.92                        | 62              | 9183              |
|                                                               | 2        | 0.72 | 0.46 | 1.12 | 3.73                        | 46              | 9193              |
|                                                               | 3        | 1.01 | 0.65 | 1.56 | 4.37                        | 63              | 9074              |
|                                                               | 4        | 0.64 | 0.39 | 1.04 | 5.06                        | 46              | 9246              |
|                                                               | 5        | 0.76 | 0.45 | 1.27 | 6.23                        | 52              | 9165              |
| <b>FMC study, in women, total CHD events (4)<sup>4</sup></b>  |          |      |      |      |                             |                 |                   |
|                                                               | 1        | 1    | 1    | 1    | 1.14                        | 60              | 7762              |
|                                                               | 2        | 0.61 | 0.34 | 1.09 | 1.47                        | 52              | 8096              |
|                                                               | 3        | 0.57 | 0.23 | 1.40 | 2.22                        | 50              | 7785              |
| <b>FMC study, in men, total CHD events (4)<sup>4</sup></b>    |          |      |      |      |                             |                 |                   |
|                                                               | 1        | 1    | 1    | 1    | 1.11                        | 81              | 4777              |

|                                                              |   |      |      |      |      |    |        |
|--------------------------------------------------------------|---|------|------|------|------|----|--------|
|                                                              | 2 | 0.66 | 0.44 | 1.00 | 1.32 | 58 | 4982   |
|                                                              | 3 | 0.57 | 0.35 | 0.92 | 1.49 | 55 | 4984   |
|                                                              | 4 | 0.62 | 0.35 | 1.08 | 1.76 | 72 | 4911   |
|                                                              | 5 | 0.40 | 0.18 | 0.87 | 2.64 | 56 | 4945   |
| <b>WHS study, in women, total CHD events (4)<sup>4</sup></b> |   |      |      |      |      |    |        |
|                                                              | 1 | 1    | 1    | 1    | 3.34 | 29 | 37,506 |
|                                                              | 2 | 0.93 | 0.53 | 1.63 | 4.15 | 27 | 38,010 |
|                                                              | 3 | 0.94 | 0.51 | 1.72 | 4.76 | 26 | 38,151 |
|                                                              | 4 | 1.14 | 0.59 | 2.20 | 5.45 | 29 | 38,444 |
|                                                              | 5 | 1.46 | 0.70 | 3.04 | 6.61 | 41 | 38,644 |
| <b>VIP study, in women, total CHD events (4)<sup>4</sup></b> |   |      |      |      |      |    |        |
|                                                              | 1 | 1    | 1    | 1    | 2.72 | 6  | 14,496 |
|                                                              | 2 | 1.27 | 0.35 | 4.67 | 3.26 | 14 | 14,975 |
|                                                              | 3 | 0.54 | 0.06 | 4.85 | 4.10 | 3  | 14,401 |
| <b>VIP study, in men, total CHD events (4)<sup>4</sup></b>   |   |      |      |      |      |    |        |
|                                                              | 1 | 1    | 1    | 1    | 2.74 | 54 | 12,920 |
|                                                              | 2 | 1.08 | 0.63 | 1.85 | 3.37 | 42 | 13,411 |
|                                                              | 3 | 1.57 | 0.71 | 3.45 | 4.26 | 38 | 12,899 |

<sup>1</sup> Calculated E% of LA by means of calorie intake.

<sup>2</sup> Number of person, not person-years

<sup>3</sup> Updated published data

<sup>4</sup> Data from unpublished cohort studies

ARIC, Atherosclerosis Risk in Communities Study; ATBC, Alpha-Tocopherol and Beta-Carotene Cancer Prevention; CHD, coronary heart disease; FMC, Finnish Mobile Clinic Health Study; HPFS, Health Professional s' Follow-up Study; IWHS, Iowa Women's Health Study; LA, linoleic acid; MONICA, Multinational Monitoring of Trends and Determinants in Cardiovascular Diseases; MORGEN, Monitoring Project on Risk Factors for Chronic Diseases; NHS, Nurses' Health Study; VIP, Västerbotten Intervention Program; WHS, Women's Health Study.

Table S2. Extracted and calculated data for the included studies for dietary linoleic acid and coronary heart disease deaths.

| Study name                                              | Category | RR   | LL   | UL    | Median of E% from LA intake | Number of cases | person/year |
|---------------------------------------------------------|----------|------|------|-------|-----------------------------|-----------------|-------------|
| <b>NHS, in women, CHD deaths (26)<sup>1</sup></b>       |          |      |      |       |                             |                 |             |
|                                                         | 1        | 1    | 1    | 1     | 2.94                        | 388             | 471,210     |
|                                                         | 2        | 0.84 | 0.70 | 1.01  | 3.95                        | 214             | 473,125     |
|                                                         | 3        | 0.78 | 0.63 | 0.95  | 4.59                        | 172             | 473,581     |
|                                                         | 4        | 0.78 | 0.62 | 0.97  | 5.25                        | 165             | 473,507     |
|                                                         | 5        | 0.69 | 0.54 | 0.88  | 6.38                        | 172             | 473,110     |
| <b>HPFS, in men, CHD deaths (27)<sup>1</sup></b>        |          |      |      |       |                             |                 |             |
|                                                         | 1        | 1    | 1    | 1     | 3.58                        | 476             | 187,389     |
|                                                         | 2        | 0.99 | 0.86 | 1.15  | 4.37                        | 408             | 188,150     |
|                                                         | 3        | 0.95 | 0.81 | 1.11  | 4.95                        | 369             | 188,444     |
|                                                         | 4        | 0.97 | 0.82 | 1.15  | 5.60                        | 359             | 188,364     |
|                                                         | 5        | 0.90 | 0.74 | 1.09  | 6.73                        | 359             | 188,368     |
| <b>ATBC study, in men, CHD deaths (28)<sup>1</sup></b>  |          |      |      |       |                             |                 |             |
|                                                         | 1        | 1    | 1    | 1     | 1.50                        | 122             | 24,343      |
|                                                         | 2        | 0.91 | 0.66 | 1.24  | 1.88                        | 97              | 24,884      |
|                                                         | 3        | 1.19 | 0.81 | 1.75  | 2.34                        | 106             | 24,752      |
|                                                         | 4        | 1.00 | 0.64 | 1.58  | 3.26                        | 83              | 25,122      |
|                                                         | 5        | 1.29 | 0.70 | 2.36  | 6.01                        | 126             | 25,093      |
| <b>ARIC Study, in men, CHD deaths (4)<sup>2</sup></b>   |          |      |      |       |                             |                 |             |
|                                                         | 1        | 1    | 1    | 1     | 2.92                        | 9               | 9202        |
|                                                         | 2        | 0.91 | 0.21 | 3.87  | 3.73                        | 6               | 9205        |
|                                                         | 3        | 1.55 | 0.47 | 5.10  | 4.37                        | 16              | 9077        |
|                                                         | 4        | 0.89 | 0.22 | 3.52  | 5.06                        | 15              | 9252        |
|                                                         | 5        | 0.54 | 0.10 | 3.00  | 6.23                        | 5               | 9176        |
| <b>FMC study, in women, CHD deaths (4)<sup>2</sup></b>  |          |      |      |       |                             |                 |             |
|                                                         | 1        | 1    | 1    | 1     | 1.14                        | 17              | 7923        |
|                                                         | 2        | 0.46 | 0.12 | 1.80  | 1.47                        | 13              | 8226        |
|                                                         | 3        | 0.69 | 0.09 | 5.11  | 2.22                        | 18              | 7933        |
| <b>FMC study, in men, CHD deaths (4)<sup>2</sup></b>    |          |      |      |       |                             |                 |             |
|                                                         | 1        | 1    | 1    | 1     | 1.11                        | 36              | 4976        |
|                                                         | 2        | 0.55 | 0.28 | 1.10  | 1.32                        | 18              | 5157        |
|                                                         | 3        | 0.94 | 0.46 | 1.93  | 1.49                        | 30              | 5088        |
|                                                         | 4        | 1.07 | 0.45 | 2.54  | 1.76                        | 36              | 5085        |
|                                                         | 5        | 0.73 | 0.23 | 2.32  | 2.64                        | 27              | 5088        |
| <b>WHS study, in women, CHD deaths (4)<sup>2</sup></b>  |          |      |      |       |                             |                 |             |
|                                                         | 1        | 1    | 1    | 1     | 3.65                        | 3               | 62,234      |
|                                                         | 2        | 0.68 | 0.07 | 6.26  | 4.76                        | 2               | 65,082      |
|                                                         | 3        | 4.28 | 0.34 | 54.42 | 6.11                        | 5               | 63,738      |
| <b>VIP study, in men, CHD deaths (4)<sup>2</sup></b>    |          |      |      |       |                             |                 |             |
|                                                         | 1        | 1    | 1    | 1     | 2.75                        | 16              | 12,996      |
|                                                         | 2        | 1.20 | 0.39 | 3.68  | 3.37                        | 11              | 13,472      |
|                                                         | 3        | 1.50 | 0.28 | 7.93  | 4.26                        | 11              | 12,942      |
| <b>IWHS study, in women, CHD deaths (4)<sup>2</sup></b> |          |      |      |       |                             |                 |             |
|                                                         | 1        | 1    | 1    | 1     | 3.65                        | 69              | 58,800      |
|                                                         | 2        | 0.64 | 0.43 | 0.95  | 4.58                        | 42              | 59,003      |
|                                                         | 3        | 0.82 | 0.55 | 1.23  | 5.28                        | 54              | 58,865      |
|                                                         | 4        | 0.87 | 0.56 | 1.34  | 6.04                        | 61              | 59,033      |
|                                                         | 5        | 0.95 | 0.57 | 1.56  | 7.31                        | 68              | 58,919      |

| <b>IIHD study, in men, CHD deaths (4)<sup>2</sup></b> |   |      |      |                               |      |    |                   |
|-------------------------------------------------------|---|------|------|-------------------------------|------|----|-------------------|
|                                                       | 1 | 1    | 1    | 1                             | 3.59 | 34 | 15,890            |
|                                                       | 2 | 1.05 | 0.64 | 1.73                          | 5.21 | 31 | 16,141            |
|                                                       | 3 | 1.07 | 0.65 | 1.76                          | 6.42 | 32 | 16,071            |
|                                                       | 4 | 1.31 | 0.80 | 2.14                          | 7.72 | 38 | 16,117            |
|                                                       | 5 | 0.97 | 0.56 | 1.67                          | 9.52 | 30 | 16,255            |
| <b>MRFIT study, in men, CHD deaths (29)</b>           |   |      |      |                               |      |    |                   |
|                                                       | 1 | 1    | 1    | 1                             | 3.30 | NA | 1251 <sup>3</sup> |
|                                                       | 2 | 0.69 | NA   | NA                            | 4.54 | NA | 1252              |
|                                                       | 3 | 0.86 | NA   | NA                            | 5.43 | NA | 1252              |
|                                                       | 4 | 0.80 | NA   | NA                            | 6.48 | NA | 1252              |
|                                                       | 5 | 0.58 | NA   | SE for Q5<br>vs Q1<br>=0.2362 | 8.84 | NA | 1251              |

<sup>1</sup> Updated published data

<sup>2</sup> Data from unpublished cohort studies

<sup>3</sup> Number of person, not person-years

ARIC, Atherosclerosis Risk in Communities Study; ATBC, Alpha-Tocopherol and Beta-Carotene Cancer Prevention; CHD, coronary heart disease; FMC, Finnish Mobile Clinic Health Study; HPFS, Health Professional s' Follow-up Study; IIHD, Israeli Ischemic Heart Disease Study; IWHS, Iowa Women's Health Study; LA, linoleic acid; MRFIT, Multiple Risk Factor Intervention Trial; NHS, Nurses' Health Study; VIP, Västerbotten Intervention Program; WHS, Women's Health Study.

Table S3. Extracted and calculated data for the included studies for substituting dietary linoleic acid for saturated fat and coronary heart disease events.

| Study name                                                    | Category | RR   | LL   | UL   | Median of E% from LA intake | Number of cases | person/year |
|---------------------------------------------------------------|----------|------|------|------|-----------------------------|-----------------|-------------|
| <b>NHS, in women, total CHD events (26)<sup>3</sup></b>       |          |      |      |      |                             |                 |             |
|                                                               | 1        | 1    | 1    | 1    | 2.94                        | 1099            | 465,643     |
|                                                               | 2        | 0.86 | 0.78 | 0.95 | 3.95                        | 729             | 467,525     |
|                                                               | 3        | 0.88 | 0.79 | 0.98 | 4.60                        | 680             | 467,975     |
|                                                               | 4        | 0.81 | 0.72 | 0.91 | 5.26                        | 621             | 467,906     |
|                                                               | 5        | 0.76 | 0.67 | 0.86 | 6.38                        | 647             | 467,547     |
| <b>HPFS, in men, total CHD events (27)<sup>3</sup></b>        |          |      |      |      |                             |                 |             |
|                                                               | 1        | 1    | 1    | 1    | 3.58                        | 842             | 182,079     |
|                                                               | 2        | 0.99 | 0.89 | 1.10 | 4.37                        | 776             | 182,779     |
|                                                               | 3        | 1.01 | 0.90 | 1.13 | 4.95                        | 758             | 182,970     |
|                                                               | 4        | 1.00 | 0.88 | 1.12 | 5.60                        | 731             | 182,931     |
|                                                               | 5        | 0.96 | 0.84 | 1.10 | 6.73                        | 735             | 182,930     |
| <b>ATBC study, in men, total CHD events (28)<sup>3</sup></b>  |          |      |      |      |                             |                 |             |
|                                                               | 1        | 1    | 1    | 1    | 1.50                        | 307             | 23,825      |
|                                                               | 2        | 0.85 | 0.69 | 1.04 | 1.88                        | 251             | 24,409      |
|                                                               | 3        | 0.91 | 0.71 | 1.16 | 2.34                        | 261             | 24,269      |
|                                                               | 4        | 0.81 | 0.62 | 1.06 | 3.26                        | 235             | 24,702      |
|                                                               | 5        | 0.83 | 0.58 | 1.19 | 6.01                        | 285             | 24,608      |
| <b>ARIC Study, in women, total CHD events (4)<sup>4</sup></b> |          |      |      |      |                             |                 |             |
|                                                               | 1        | 1    | 1    | 1    | 2.96                        | 47              | 19,078      |
|                                                               | 2        | 0.62 | 0.35 | 1.10 | 4.08                        | 35              | 19,925      |
|                                                               | 3        | 0.72 | 0.38 | 1.38 | 5.54                        | 41              | 19,196      |
| <b>ARIC Study, in men, total CHD events (4)<sup>4</sup></b>   |          |      |      |      |                             |                 |             |
|                                                               | 1        | 1    | 1    | 1    | 2.92                        | 62              | 9,183       |
|                                                               | 2        | 0.74 | 0.47 | 1.16 | 3.73                        | 46              | 9,193       |
|                                                               | 3        | 1.07 | 0.70 | 1.65 | 4.37                        | 63              | 9,074       |
|                                                               | 4        | 0.70 | 0.43 | 1.13 | 5.06                        | 46              | 9,246       |
|                                                               | 5        | 0.89 | 0.54 | 1.48 | 6.23                        | 52              | 9,165       |
| <b>FMC study, in women, total CHD events (4)<sup>4</sup></b>  |          |      |      |      |                             |                 |             |
|                                                               | 1        | 1    | 1    | 1    | 1.14                        | 60              | 7,762       |
|                                                               | 2        | 0.60 | 0.34 | 1.08 | 1.47                        | 52              | 8,096       |
|                                                               | 3        | 0.56 | 0.23 | 1.34 | 2.22                        | 50              | 7,785       |
| <b>FMC study, in men, total CHD events (4)<sup>4</sup></b>    |          |      |      |      |                             |                 |             |
|                                                               | 1        | 1    | 1    | 1    | 1.11                        | 81              | 4,777       |
|                                                               | 2        | 0.67 | 0.44 | 1.00 | 1.32                        | 58              | 4,982       |
|                                                               | 3        | 0.58 | 0.36 | 0.93 | 1.49                        | 55              | 4,984       |
|                                                               | 4        | 0.63 | 0.36 | 1.11 | 1.76                        | 72              | 4,911       |
|                                                               | 5        | 0.42 | 0.20 | 0.90 | 2.64                        | 56              | 4,945       |
| <b>WHS study, in women, total CHD events (4)<sup>4</sup></b>  |          |      |      |      |                             |                 |             |
|                                                               | 1        | 1    | 1    | 1    | 3.34                        | 29              | 37,506      |
|                                                               | 2        | 0.96 | 0.55 | 1.66 | 4.15                        | 27              | 38,010      |
|                                                               | 3        | 0.98 | 0.54 | 1.76 | 4.76                        | 26              | 38,151      |
|                                                               | 4        | 1.20 | 0.64 | 2.25 | 5.45                        | 29              | 38,444      |
|                                                               | 5        | 1.60 | 0.81 | 3.18 | 6.61                        | 41              | 38,644      |
| <b>VIP study, in women, total CHD events (4)<sup>4</sup></b>  |          |      |      |      |                             |                 |             |
|                                                               | 1        | 1    | 1    | 1    | 2.72                        | 6               | 14,496      |
|                                                               | 2        | 1.18 | 0.33 | 4.19 | 3.26                        | 14              | 14,975      |
|                                                               | 3        | 0.44 | 0.05 | 3.91 | 4.10                        | 3               | 14,401      |

| VIP study, in men, total CHD events (4) <sup>4</sup> |   |      |      |      |      |    |        |
|------------------------------------------------------|---|------|------|------|------|----|--------|
|                                                      | 1 | 1    | 1    | 1    | 2.75 | 54 | 12,920 |
|                                                      | 2 | 1.03 | 0.60 | 1.74 | 3.37 | 42 | 13,411 |
|                                                      | 3 | 1.40 | 0.64 | 3.05 | 4.26 | 38 | 12,899 |

<sup>1</sup> Calculated E% of LA by means of calorie intake.

<sup>2</sup> Number of person not person-years

<sup>3</sup> Updated published data

<sup>4</sup> Data from unpublished cohort studies

ARIC, Atherosclerosis Risk in Communities Study; ATBC, Alpha-Tocopherol and Beta-Carotene Cancer Prevention; CHD, coronary heart disease; FMC, Finnish Mobile Clinic Health Study; HPFS, Health Professional s' Follow-up Study; IWHS, Iowa Women's Health Study; LA, linoleic acid; NHS, Nurses' Health Study; VIP, Västerbotten Intervention Program; WHS, Women's Health Study.

Table S4. Extracted and calculated data for the included studies for substituting dietary linoleic acid for saturated fat and coronary heart disease deaths.

| Study name                                              | Category | RR   | LL   | UL    | Median of E% from LA intake | Number of cases | person/year |
|---------------------------------------------------------|----------|------|------|-------|-----------------------------|-----------------|-------------|
| <b>NHS, in women, CHD deaths (26)<sup>1</sup></b>       |          |      |      |       |                             |                 |             |
|                                                         | 1        | 1    | 1    | 1     | 2.94                        | 388             | 471,210     |
|                                                         | 2        | 0.86 | 0.72 | 1.03  | 3.95                        | 214             | 473,125     |
|                                                         | 3        | 0.80 | 0.65 | 0.98  | 4.59                        | 172             | 473,581     |
|                                                         | 4        | 0.81 | 0.66 | 1.01  | 5.25                        | 165             | 473,507     |
|                                                         | 5        | 0.74 | 0.58 | 0.92  | 6.38                        | 172             | 473,110     |
| <b>HPFS, in men, CHD deaths (27)<sup>1</sup></b>        |          |      |      |       |                             |                 |             |
|                                                         | 1        | 1    | 1    | 1     | 3.58                        | 476             | 187,389     |
|                                                         | 2        | 0.98 | 0.85 | 1.14  | 4.37                        | 408             | 188,150     |
|                                                         | 3        | 0.94 | 0.80 | 1.10  | 4.95                        | 369             | 188,444     |
|                                                         | 4        | 0.96 | 0.81 | 1.13  | 5.60                        | 359             | 188,364     |
|                                                         | 5        | 0.89 | 0.74 | 1.07  | 6.73                        | 359             | 188,368     |
| <b>ATBC study, in men, CHD deaths (28)<sup>1</sup></b>  |          |      |      |       |                             |                 |             |
|                                                         | 1        | 1    | 1    | 1     | 1.50                        | 122             | 24,343      |
|                                                         | 2        | 0.91 | 0.66 | 1.25  | 1.88                        | 97              | 24,884      |
|                                                         | 3        | 1.21 | 0.83 | 1.76  | 2.34                        | 106             | 24,752      |
|                                                         | 4        | 1.03 | 0.67 | 1.59  | 3.26                        | 83              | 25,122      |
|                                                         | 5        | 1.38 | 0.80 | 2.37  | 6.01                        | 126             | 25,093      |
| <b>ARIC Study, in men, CHD deaths (4)<sup>2</sup></b>   |          |      |      |       |                             |                 |             |
|                                                         | 1        | 1    | 1    | 1     | 2.92                        | 9               | 9,202       |
|                                                         | 2        | 1.04 | 0.24 | 4.44  | 3.73                        | 6               | 9,205       |
|                                                         | 3        | 1.69 | 0.52 | 5.51  | 4.37                        | 16              | 9,077       |
|                                                         | 4        | 1.09 | 0.28 | 4.23  | 5.06                        | 15              | 9,252       |
|                                                         | 5        | 0.90 | 0.17 | 4.83  | 6.23                        | 5               | 9,176       |
| <b>FMC study, in women, CHD deaths (4)<sup>2</sup></b>  |          |      |      |       |                             |                 |             |
|                                                         | 1        | 1    | 1    | 1     | 1.14                        | 17              | 7,923       |
|                                                         | 2        | 0.46 | 0.12 | 1.80  | 1.47                        | 13              | 8,226       |
|                                                         | 3        | 0.70 | 0.10 | 4.98  | 2.22                        | 18              | 7,933       |
| <b>FMC study, in men, CHD deaths (4)<sup>2</sup></b>    |          |      |      |       |                             |                 |             |
|                                                         | 1        | 1    | 1    | 1     | 1.11                        | 36              | 4,976       |
|                                                         | 2        | 0.55 | 0.28 | 1.10  | 1.32                        | 18              | 5,157       |
|                                                         | 3        | 0.94 | 0.46 | 1.91  | 1.49                        | 30              | 5,088       |
|                                                         | 4        | 1.06 | 0.45 | 2.50  | 1.76                        | 36              | 5,085       |
|                                                         | 5        | 0.72 | 0.24 | 2.23  | 2.64                        | 27              | 5,088       |
| <b>WHS study, in women, CHD deaths (4)<sup>2</sup></b>  |          |      |      |       |                             |                 |             |
|                                                         | 1        | 1    | 1    | 1     | 3.65                        | 3               | 62,234      |
|                                                         | 2        | 0.62 | 0.07 | 5.46  | 4.76                        | 2               | 65,082      |
|                                                         | 3        | 2.17 | 0.22 | 21.49 | 6.11                        | 5               | 63,738      |
| <b>VIP study, in men, CHD deaths (4)<sup>2</sup></b>    |          |      |      |       |                             |                 |             |
|                                                         | 1        | 1    | 1    | 1     | 2.75                        | 16              | 12,996      |
|                                                         | 2        | 1.07 | 0.36 | 3.17  | 3.37                        | 11              | 13,472      |
|                                                         | 3        | 1.27 | 0.25 | 6.42  | 4.26                        | 11              | 12,942      |
| <b>IWHS study, in women, CHD deaths (4)<sup>2</sup></b> |          |      |      |       |                             |                 |             |
|                                                         | 1        | 1    | 1    | 1     | 3.65                        | 69              | 58,800      |
|                                                         | 2        | 0.61 | 0.41 | 0.91  | 4.58                        | 42              | 59,003      |
|                                                         | 3        | 0.78 | 0.53 | 1.14  | 5.28                        | 54              | 58,865      |
|                                                         | 4        | 0.80 | 0.53 | 1.20  | 6.04                        | 61              | 59,033      |
|                                                         | 5        | 0.83 | 0.53 | 1.31  | 7.31                        | 68              | 58,919      |



| <b>IIHD study, in men, CHD deaths (4) <sup>2</sup></b> |   |      |      |      |      |    |        |
|--------------------------------------------------------|---|------|------|------|------|----|--------|
|                                                        | 1 | 1    | 1    | 1    | 3.59 | 34 | 15,890 |
|                                                        | 2 | 0.97 | 0.58 | 1.61 | 5.21 | 31 | 16,141 |
|                                                        | 3 | 0.93 | 0.55 | 1.58 | 6.42 | 32 | 16,071 |
|                                                        | 4 | 1.07 | 0.62 | 1.84 | 7.72 | 38 | 16,117 |
|                                                        | 5 | 0.71 | 0.37 | 1.36 | 9.52 | 30 | 16,255 |

<sup>1</sup> Updated published data

<sup>2</sup> Data from unpublished cohort studies

<sup>3</sup> Number of person not person-years

ARIC, Atherosclerosis Risk in Communities Study; ATBC, Alpha-Tocopherol and Beta-Carotene Cancer Prevention; CHD, coronary heart disease; FMC, Finnish Mobile Clinic Health Study; HPFS, Health Professional s' Follow-up Study; IIHD, Israeli Ischemic Heart Disease Study; IWHS, Iowa Women's Health Study; LA, linoleic acid; NHS, Nurses' Health Study; VIP, Västerbotten Intervention Program; WHS, Women's Health Study.

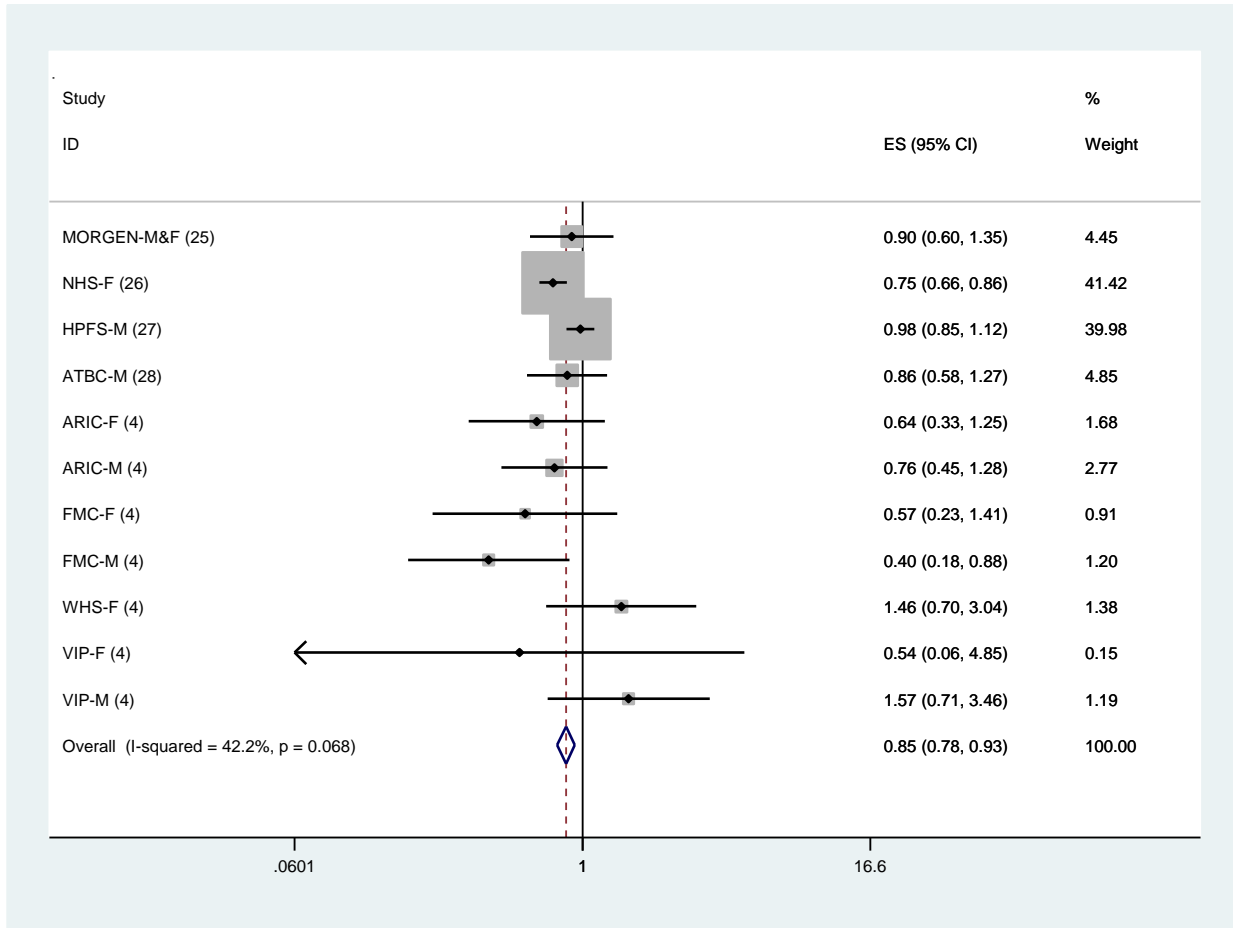

Figure S1. Substituting linoleic acid for carbohydrate and relative risk of total coronary heart disease events (highest category versus lowest category). The relative risks were pooled by using fixed effects meta-analysis.

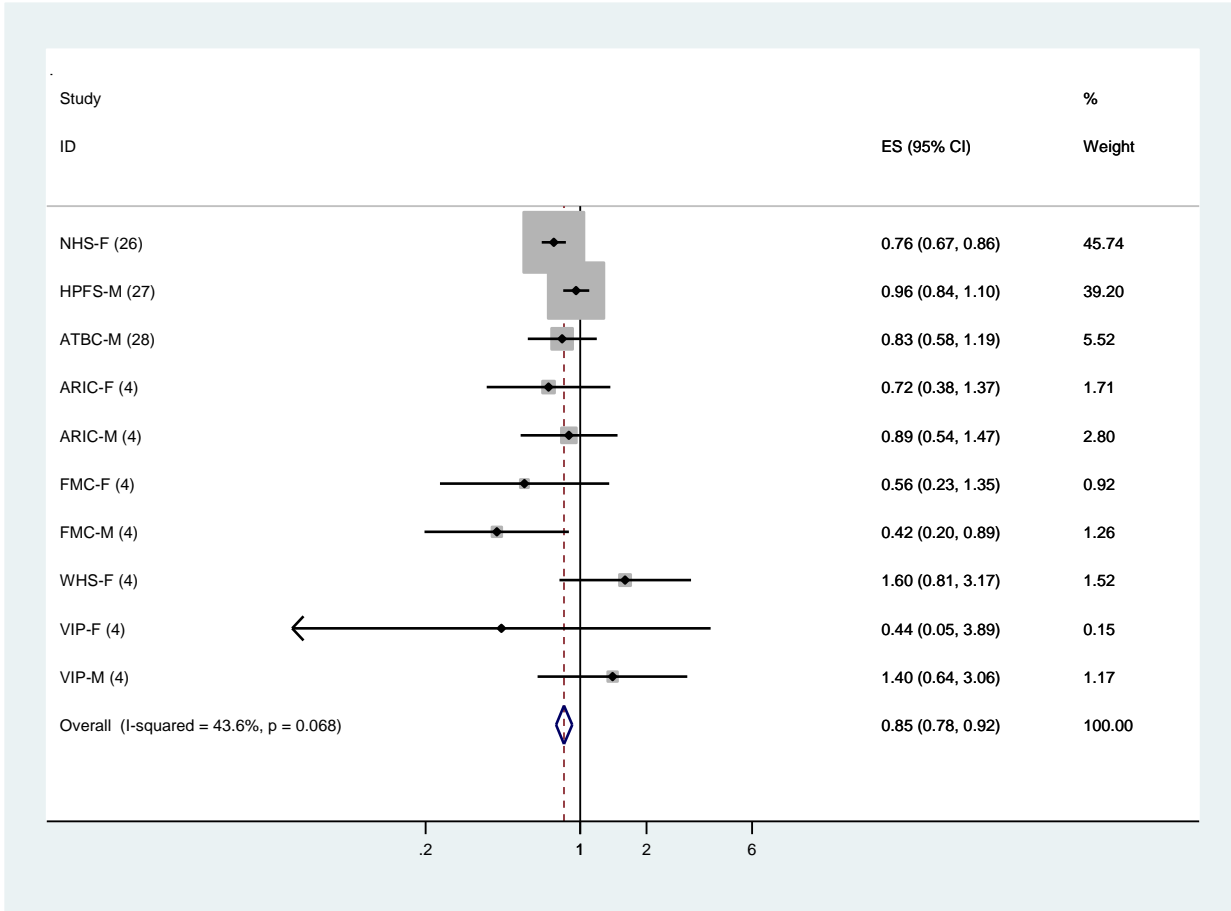

Figure S2. Substituting linoleic acid for saturated fat and relative risk of total coronary heart disease events (highest category versus lowest category). The relative risks were pooled by using fixed effects meta-analysis.

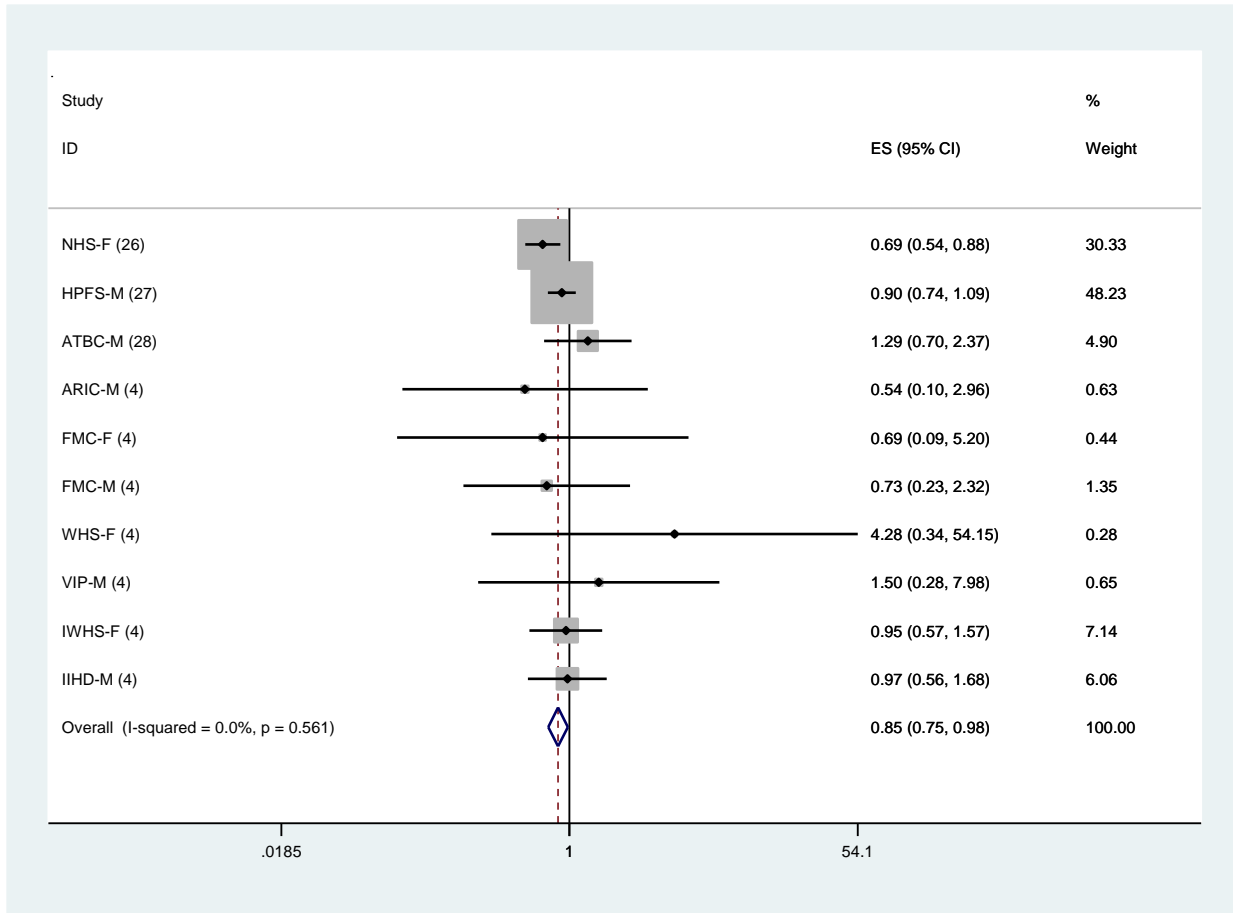

Figure S3. Substituting linoleic acid for carbohydrate and relative risk of coronary heart disease deaths (highest category versus lowest category). The relative risks were pooled by using fixed effects meta-analysis.

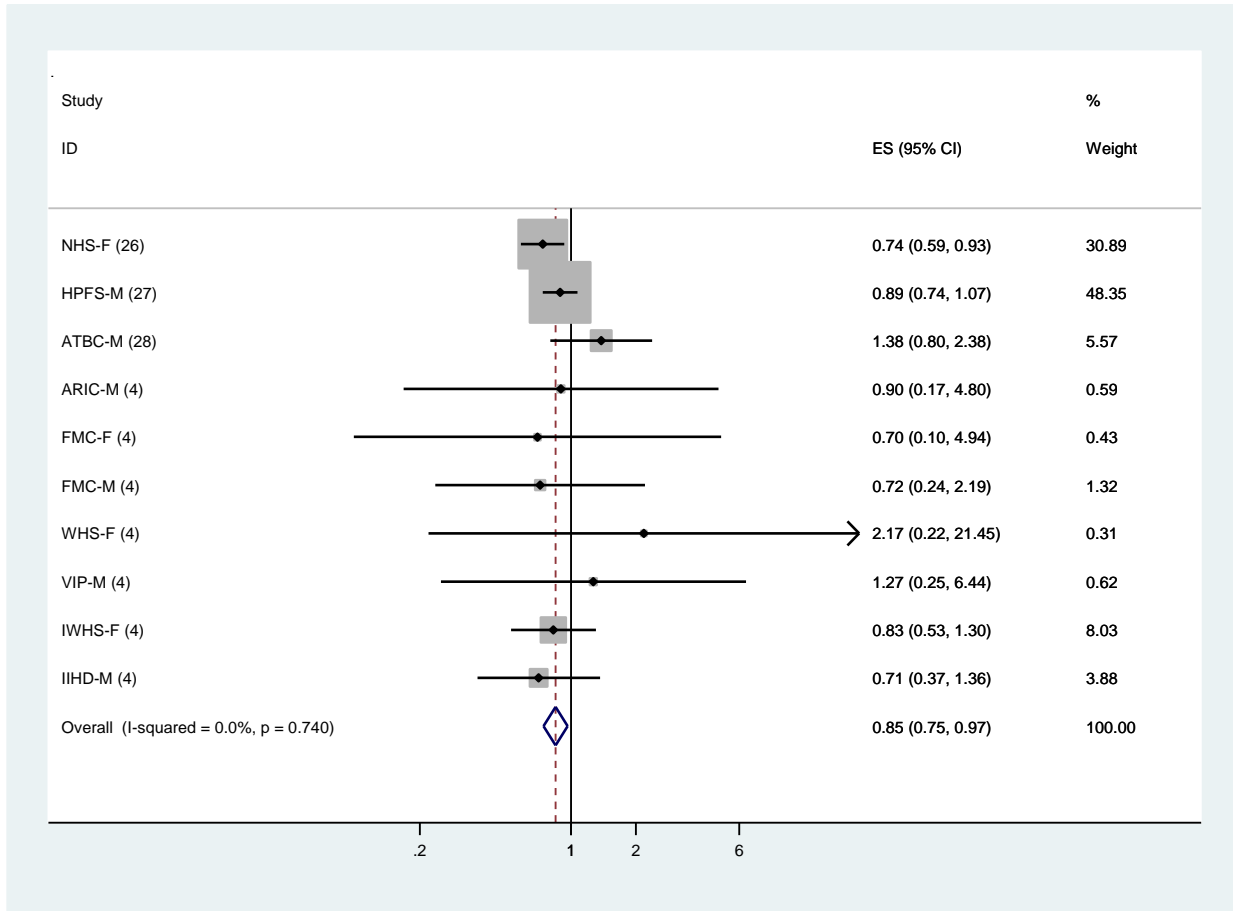

Figure S4. Substituting linoleic acid for saturated fat and relative risk of coronary heart disease deaths (highest category versus lowest category). The relative risks were pooled by using fixed effects meta-analysis.

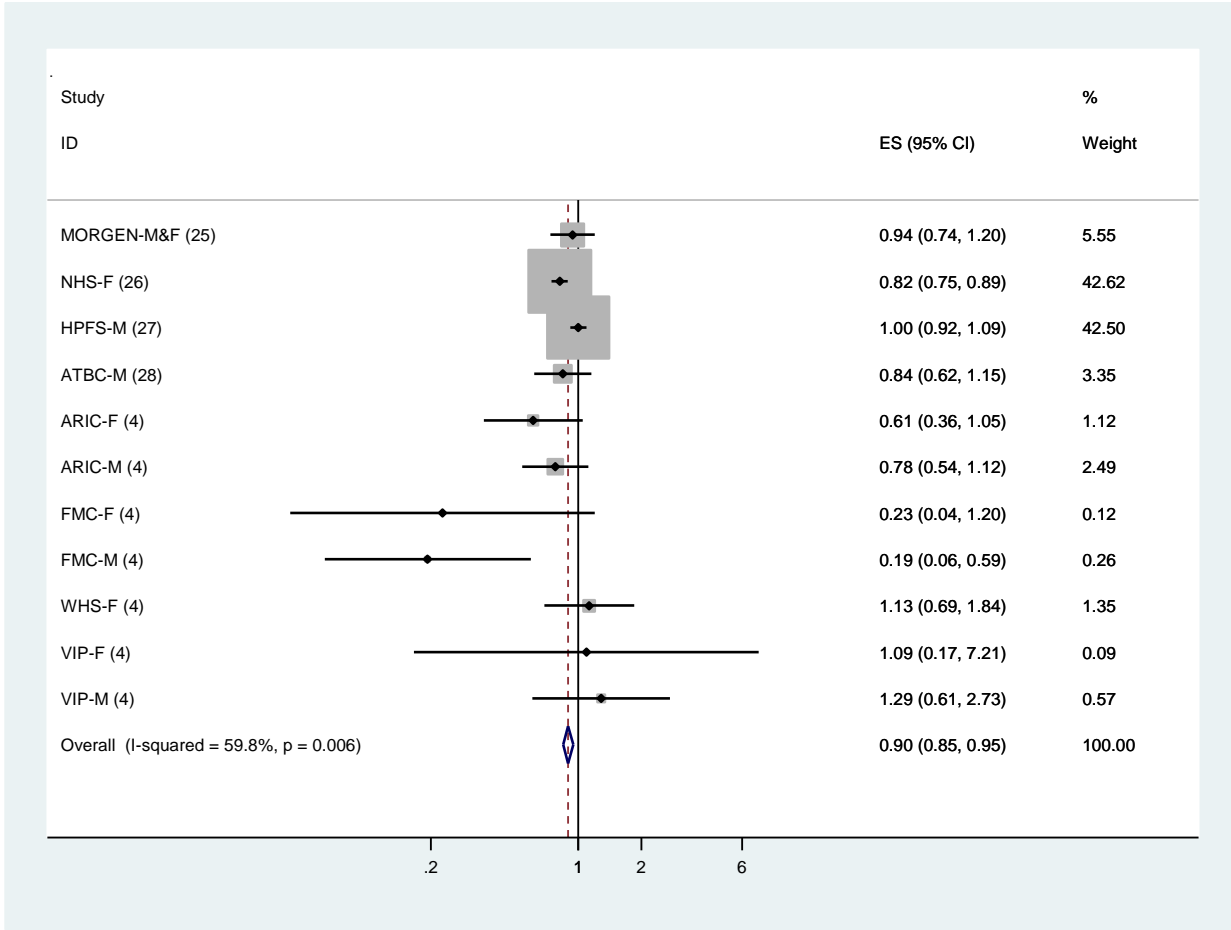

Figure S5. Two-stage dose-response meta-analysis of substituting each 5 E% of dietary intake from linoleic acid for 5 E% of dietary intake from carbohydrate and relative risk of total coronary heart disease events. The relative risks were pooled by using fixed effects meta-analysis.

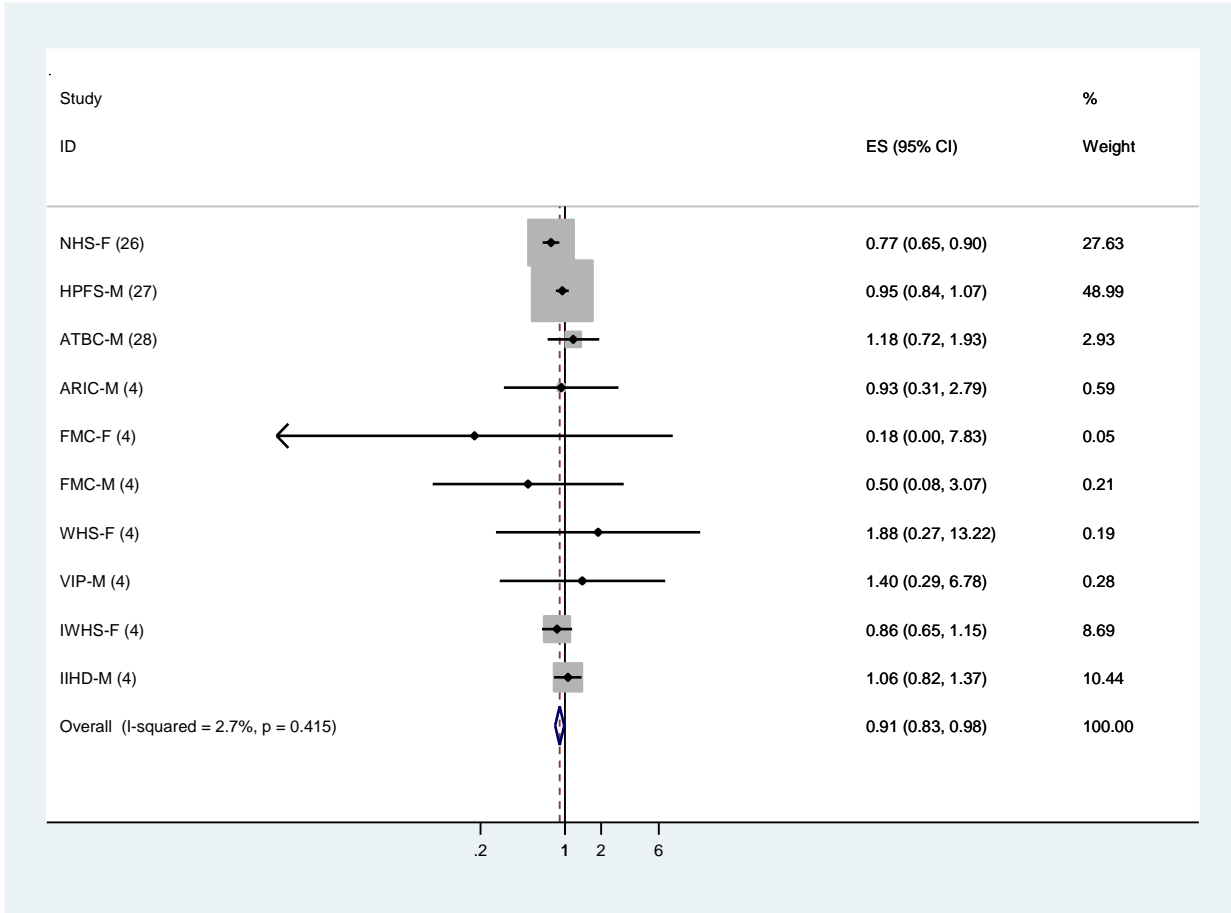

Figure S6. Two-stage dose-response meta-analysis of substituting each 5 E% of dietary intake from linoleic acid for 5 E% of dietary intake from carbohydrate and relative risk of coronary heart disease deaths. The relative risks were pooled by using fixed effects meta-analysis.

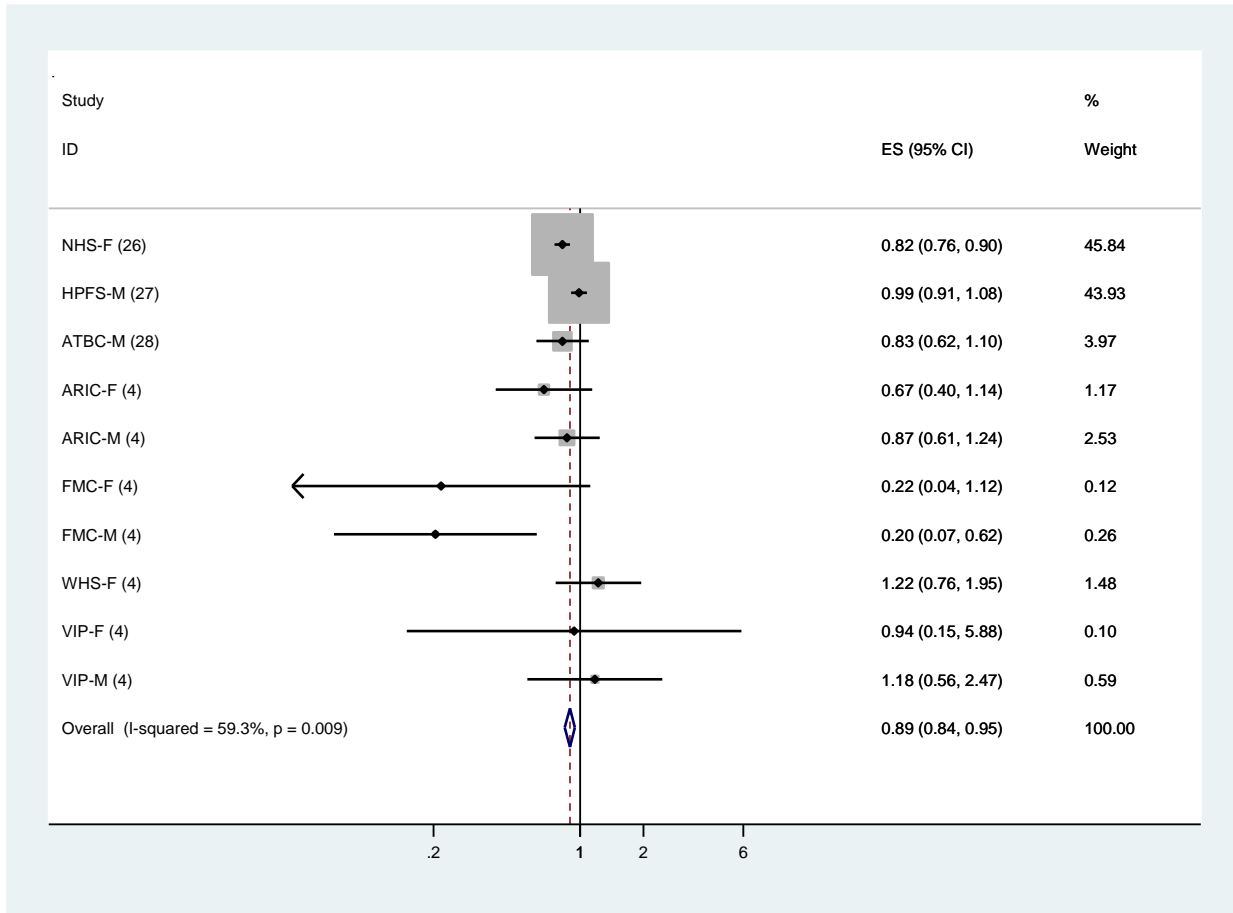

Figure S7. Two-stage dose-response meta-analysis of substituting each 5 E% of dietary intake from linoleic acid for 5 E% of dietary intake from saturated fat and relative risk of total coronary heart disease events. The relative risks were pooled by using fixed effects meta-analysis.



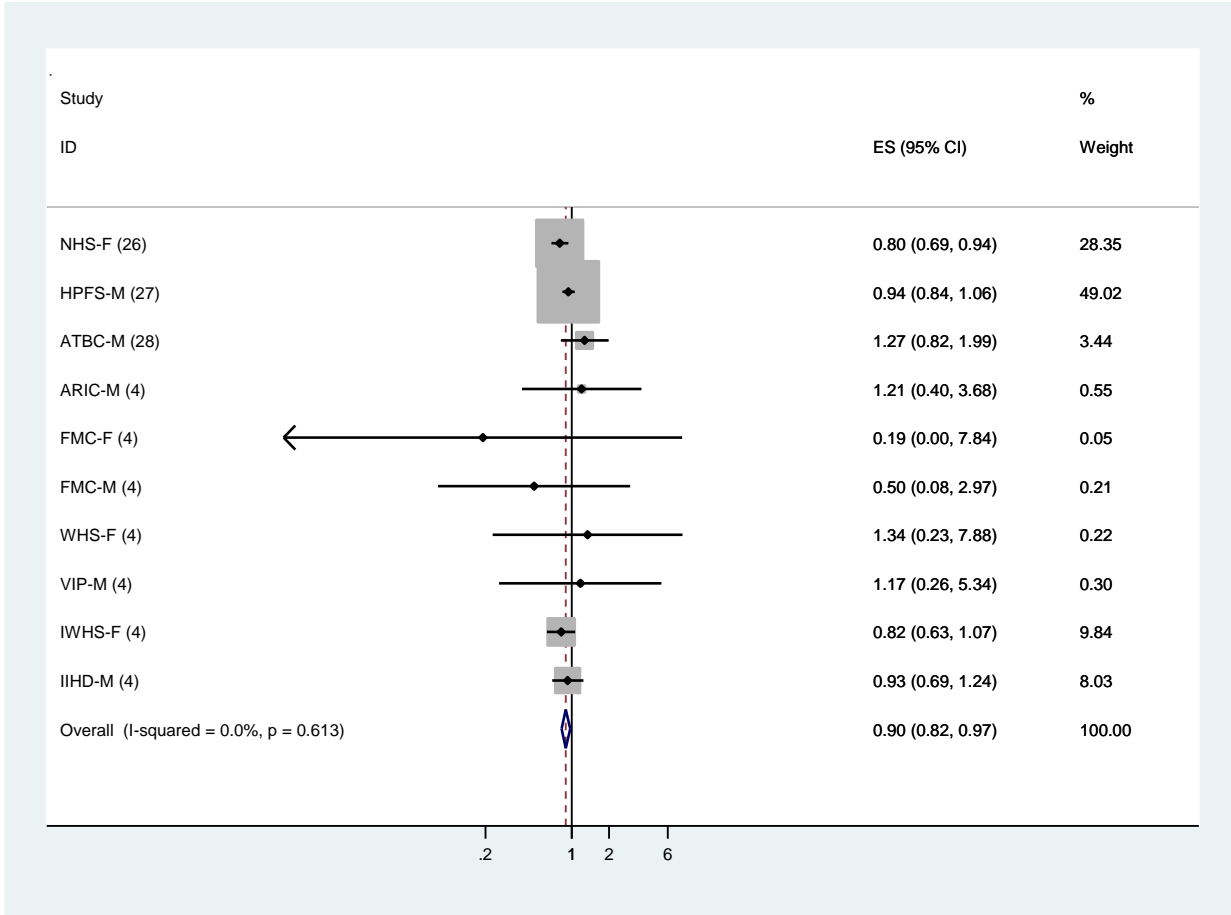

Figure S8. Two-stage dose-response meta-analysis of substituting each 5 E% of dietary intake from linoleic acid for 5 E% of dietary intake from saturated fat and relative risk of coronary heart disease deaths. The relative risks were pooled by using fixed effects meta-analysis.

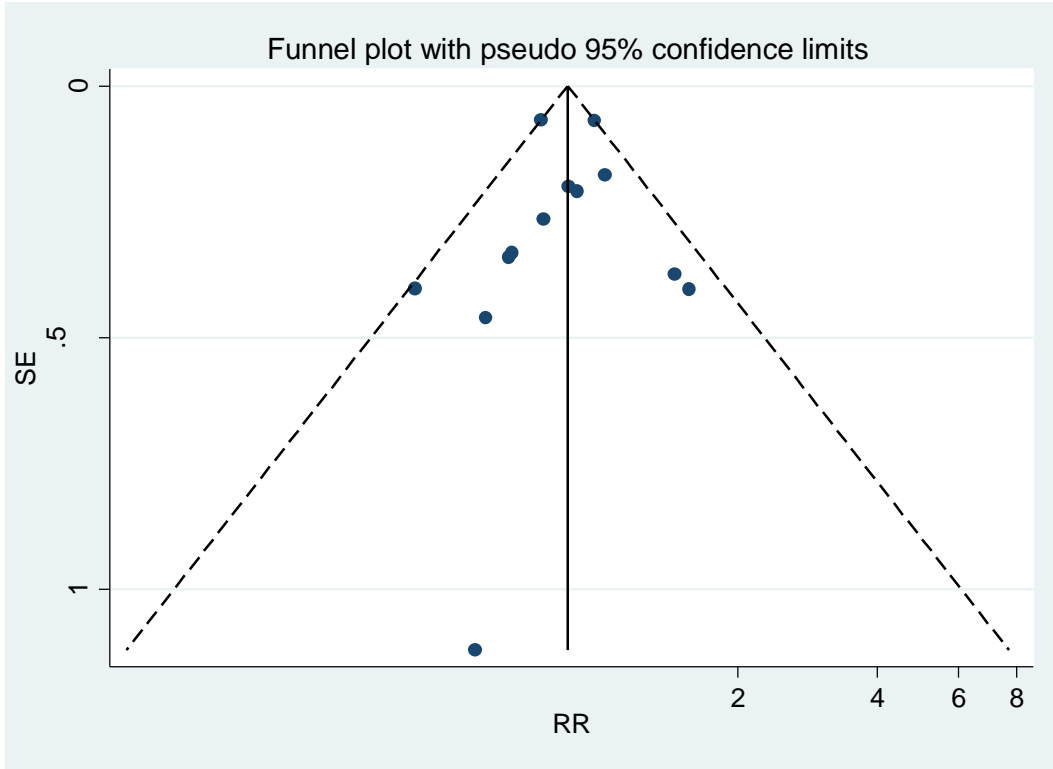

Figure S9. Funnel Plots for Detection of Publication Bias for dietary linoleic acid intake and risk of total coronary heart disease.

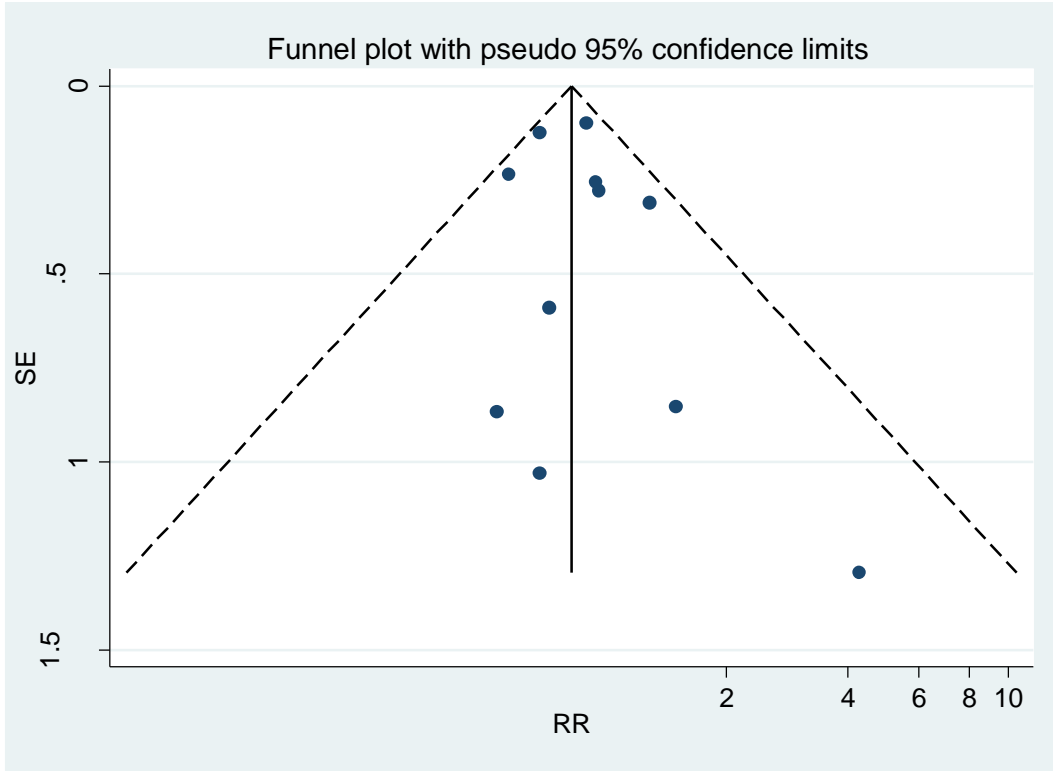

Figure S10. Funnel Plots for Detection of Publication Bias for dietary linoleic acid intake and risk of coronary heart disease deaths.
